# Supplementary material for: Photo-induced sol–gel synthesis of polymer-supported silsesquioxane membranes
Source: Royal Society of Chemistry journal article supplement (doi:10.1039/c6ra21161e), 2017-01-01
Supplement: c6ra21161e1.pdf [file c6ra21161e1.pdf]

Electronic Supplementary Information

## Photo-induced sol-gel synthesis of polymer-supported silsesquioxane membranes

H. Nagasawa, M. Nishibayashi, M. Kanezashi, T. Yoshioka, T. Tsuru

*Department of Chemical Engineering, Hiroshima University, 1-4-1 Kagamiyama, Higashihiroshima, Hiroshima 739-0047, Japan*

### ESI-1

Figure S1 shows the FTIR spectra of BTESE-derived films prepared with different UV irradiation time. The absorption peak at  $2980\text{ cm}^{-1}$ , which can be ascribed to the vibration of  $\text{CH}_3$  in the ethoxy groups, was clearly observed for the spectrum for the film before the UV irradiation. As can be seen in the spectra for the film after 15 s of UV irradiation, the peak of ethoxy groups was still significant. While, for the films after 30 and 120 s of UV irradiation, the peak at  $2980\text{ cm}^{-1}$  decreased and the peak at  $900\text{ cm}^{-1}$ , which is ascribed to the silanol groups, increased. This indicates that the photo-induced hydrolysis of ethoxy groups in BTESE-derived sols took 30 s to complete the reaction. The required UV irradiation time was longer than that for BTMSE-derived films probably due to the lower reactivity of ethoxy groups compared with methoxy groups.

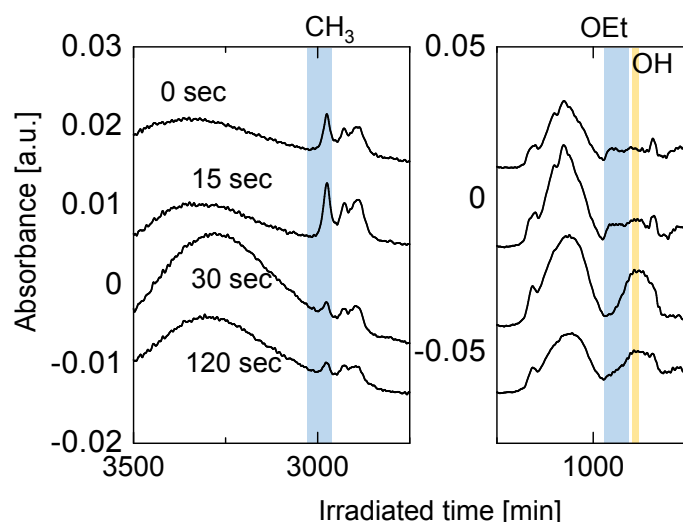

Figure S-1. FTIR spectra of BTESE-derived films with PAG before and after UV-irradiation for 15, 30, and 120 s. The light-to-sample distance was 200 mm.
